# Supplementary material for: Unveiling the Potential of Watermelon Rind Extract: Impact on Cell Proliferation, Apoptosis, Senescence, and Transcriptomic Profile in Human Renal Adenocarcinoma Cells
Source: Preprints.org preprint supplement (doi:10.20944/preprints202309.1137.v1), 2023-09-18
Supplement: Supplementary file 3 [file supplemenarty table.1.docx]

| **GeneID** | **baseMean** | **log2FoldChange** | **lfcSE** |  | **pvalue** | **padj** | **Regulation** | **Annotation** |
| --- | --- | --- | --- | --- | --- | --- | --- | --- |
| NPTX1 | 72.01937727 | 3.822151586 | 0.3692 |  | 4.0793E-25 | 1.40205E-22 | UP | neuronal pentraxin 1(NPTX1) |
| LTB | 179.4225109 | 2.944053843 | 0.22385 |  | 1.6534E-39 | 1.23681E-36 | UP | lymphotoxin beta(LTB) |
| PECAM1 | 9.255016716 | 2.818549768 | 0.81344 |  | 0.0005303 | 0.00333193 | UP | platelet and endothelial cell adhesion molecule 1(PECAM1) |
| HMOX1 | 5015.831477 | 2.791739716 | 0.42932 |  | 7.8896E-11 | 3.72984E-09 | UP | heme oxygenase 1(HMOX1) |
| VNN1 | 11.21702294 | 2.722067892 | 0.73444 |  | 0.00021028 | 0.001563837 | UP | vanin 1(VNN1) |
| ENSG00000289088 | 9.23435556 | 2.579239162 | 0.83977 |  | 0.00213085 | 0.010593432 | UP | #N/A |
| TRIM31 | 9.080422633 | 2.578310857 | 0.87069 |  | 0.00306423 | 0.014206294 | UP | tripartite motif containing 31(TRIM31) |
| CXCL8 | 391.2561874 | 2.518431015 | 0.1521 |  | 1.399E-61 | 2.96515E-58 | UP | C-X-C motif chemokine ligand 8(CXCL8) |
| CXCL2 | 59.46263547 | 2.390913463 | 0.3307 |  | 4.8345E-13 | 3.41557E-11 | UP | C-X-C motif chemokine ligand 2(CXCL2) |
| ENSG00000217825 | 9.987785824 | 2.351695319 | 0.73439 |  | 0.00136368 | 0.007357624 | UP | #N/A |
| CSF2 | 191.4758711 | 2.293901374 | 0.22488 |  | 1.9688E-24 | 6.25941E-22 | UP | colony stimulating factor 2(CSF2) |
| OR2I1P | 125.0513163 | 2.231299376 | 0.23457 |  | 1.8641E-21 | 4.64817E-19 | UP | olfactory receptor family 2 subfamily I member 1 pseudogene(OR2I1P) |
| FBXO2 | 11.32453863 | 2.109406261 | 0.70507 |  | 0.00277372 | 0.013147017 | UP | F-box protein 2(FBXO2) |
| TRAF1 | 28.9752565 | 2.107063383 | 0.47684 |  | 9.9249E-06 | 0.000117083 | UP | TNF receptor associated factor 1(TRAF1) |
| ENSG00000234537 | 14.6244859 | 2.056621595 | 0.66044 |  | 0.00184553 | 0.009421767 | UP | #N/A |
| FAM138E | 19.25950678 | 2.045475997 | 0.53972 |  | 0.00015074 | 0.001184009 | UP | family with sequence similarity 138 member E(FAM138E) |
| MIR3142HG | 25.619447 | 2.011663727 | 0.4538 |  | 9.2965E-06 | 0.000110283 | UP | MIR3142 host gene(MIR3142HG) |
| ANO9 | 52.17638965 | 1.933822361 | 0.33134 |  | 5.333E-09 | 1.6501E-07 | UP | anoctamin 9(ANO9) |
| NAGLU | 12.47450292 | 1.921874255 | 0.66472 |  | 0.00383688 | 0.01715669 | UP | N-acetyl-alpha-glucosaminidase(NAGLU) |
| ZMIZ1-AS1 | 13.95999556 | 1.903714488 | 0.67565 |  | 0.0048386 | 0.020724991 | UP | ZMIZ1 antisense RNA 1(ZMIZ1-AS1) |
| ARL2BP | 13.29894498 | 1.896221499 | 0.66549 |  | 0.00438084 | 0.019118456 | UP | ADP ribosylation factor like GTPase 2 binding protein(ARL2BP) |
| KDF1 | 9.1253128 | 1.864605173 | 0.75997 |  | 0.01414606 | 0.049178644 | UP | keratinocyte differentiation factor 1(KDF1) |
| SLC6A12 | 9.880739992 | 1.862599952 | 0.72337 |  | 0.01002726 | 0.03734017 | UP | solute carrier family 6 member 12(SLC6A12) |
| COL17A1 | 15.60890675 | 1.839391497 | 0.59518 |  | 0.00199846 | 0.010065131 | UP | collagen type XVII alpha 1 chain(COL17A1) |
| CITED4 | 560.0368999 | 1.796919444 | 0.11852 |  | 6.3472E-52 | 7.33794E-49 | UP | Cbp/p300 interacting transactivator with Glu/Asp rich carboxy-terminal domain 4(CITED4) |
| C3 | 494.7153689 | 1.788111029 | 0.12647 |  | 2.2122E-45 | 2.16402E-42 | UP | complement C3(C3) |
| ALPK3 | 9.562138286 | 1.786908455 | 0.72977 |  | 0.01434153 | 0.049695147 | UP | alpha kinase 3(ALPK3) |
| TNFAIP3 | 396.8354414 | 1.77972605 | 0.16155 |  | 3.1798E-28 | 1.3479E-25 | UP | TNF alpha induced protein 3(TNFAIP3) |
| BIRC3 | 623.0128444 | 1.77722347 | 0.10906 |  | 1.0445E-59 | 1.47594E-56 | UP | baculoviral IAP repeat containing 3(BIRC3) |
| CBLN3 | 17.21117487 | 1.768674376 | 0.56806 |  | 0.00184862 | 0.009433762 | UP | cerebellin 3 precursor(CBLN3) |
| EFEMP2 | 10.8345093 | 1.753814923 | 0.70469 |  | 0.01281816 | 0.045380994 | UP | EGF containing fibulin extracellular matrix protein 2(EFEMP2) |
| CLEC4E | 21.97919912 | 1.729068492 | 0.47775 |  | 0.00029554 | 0.002074186 | UP | C-type lectin domain family 4 member E(CLEC4E) |
| ENSG00000272141 | 25.14557013 | 1.700340866 | 0.44134 |  | 0.00011682 | 0.000961524 | UP | #N/A |
| GPR156 | 14.57353297 | 1.695993966 | 0.60881 |  | 0.0053407 | 0.022429883 | UP | G protein-coupled receptor 156(GPR156) |
| CTSS | 17.74873139 | 1.650039926 | 0.53081 |  | 0.00188018 | 0.009556444 | UP | cathepsin S(CTSS) |
| VCAM1 | 19.38402297 | 1.627094205 | 0.51745 |  | 0.00166415 | 0.008648537 | UP | vascular cell adhesion molecule 1(VCAM1) |
| LAMB3 | 303.2636745 | 1.612136661 | 0.15416 |  | 1.357E-25 | 4.79374E-23 | UP | laminin subunit beta 3(LAMB3) |
| LINC00887 | 11.97109581 | 1.604240482 | 0.64463 |  | 0.01282322 | 0.045386292 | UP | long intergenic non-protein coding RNA 887(LINC00887) |
| LINC01772 | 15.69339334 | 1.591827341 | 0.60101 |  | 0.00808337 | 0.031388652 | UP | long intergenic non-protein coding RNA 1772(LINC01772) |
| C2CD4A | 25.11483276 | 1.577962591 | 0.51937 |  | 0.00237966 | 0.011568106 | UP | C2 calcium dependent domain containing 4A(C2CD4A) |
| ENSG00000229672 | 29.70834436 | 1.563669784 | 0.40503 |  | 0.00011308 | 0.000934986 | UP | #N/A |
| ARL14EPL | 33.44418094 | 1.547690482 | 0.41506 |  | 0.00019239 | 0.001456353 | UP | ADP ribosylation factor like GTPase 14 effector protein like(ARL14EPL) |
| CXCL3 | 14.57097679 | 1.519626104 | 0.57373 |  | 0.00808053 | 0.031388652 | UP | C-X-C motif chemokine ligand 3(CXCL3) |
| DPP3-DT | 16.3276951 | 1.510365397 | 0.54382 |  | 0.00548124 | 0.022884074 | UP | DPP3 divergent transcript(DPP3-DT) |
| C1R | 15.6821735 | 1.500354706 | 0.55657 |  | 0.00702407 | 0.02805437 | UP | complement C1r(C1R) |
| THBD | 33.73003086 | 1.487504183 | 0.37832 |  | 8.4271E-05 | 0.000728278 | UP | thrombomodulin(THBD) |
| NFKBID | 67.02758427 | 1.4789834 | 0.2704 |  | 4.511E-08 | 1.08647E-06 | UP | NFKB inhibitor delta(NFKBID) |
| RASD2 | 31.0572788 | 1.478241855 | 0.4063 |  | 0.00027447 | 0.001948874 | UP | RASD family member 2(RASD2) |
| CCDC28B | 42.19107667 | 1.468454983 | 0.34525 |  | 2.1069E-05 | 0.000220871 | UP | coiled-coil domain containing 28B(CCDC28B) |
| MAPK13 | 18.53012483 | 1.467798471 | 0.50408 |  | 0.00359285 | 0.016231009 | UP | mitogen-activated protein kinase 13(MAPK13) |
| ENSG00000285744 | 137.5411721 | 1.467701975 | 0.20486 |  | 7.8131E-13 | 5.25709E-11 | UP | #N/A |
| LINC00472 | 44.33167932 | 1.467452434 | 0.33673 |  | 1.3128E-05 | 0.000148121 | UP | long intergenic non-protein coding RNA 472(LINC00472) |
| AGPAT1 | 15.49631238 | 1.462735555 | 0.5708 |  | 0.01038859 | 0.038371088 | UP | 1-acylglycerol-3-phosphate O-acyltransferase 1(AGPAT1) |
| APOBEC3G | 14.80258467 | 1.460290422 | 0.57335 |  | 0.01086754 | 0.039770506 | UP | apolipoprotein B mRNA editing enzyme catalytic subunit 3G(APOBEC3G) |
| IL4I1 | 45.34921914 | 1.44733932 | 0.33278 |  | 1.3661E-05 | 0.000153066 | UP | interleukin 4 induced 1(IL4I1) |
| TUBB2B | 15.85319846 | 1.434770083 | 0.5715 |  | 0.01205553 | 0.043198149 | UP | tubulin beta 2B class IIb(TUBB2B) |
| ICAM1 | 320.9656981 | 1.426350434 | 0.15845 |  | 2.213E-19 | 4.1387E-17 | UP | intercellular adhesion molecule 1(ICAM1) |
| LINC02672 | 26.91463457 | 1.405430517 | 0.43402 |  | 0.00120312 | 0.006629153 | UP | long intergenic non-protein coding RNA 2672(LINC02672) |
| ENSG00000275741 | 239.75479 | 1.385389315 | 0.16881 |  | 2.2717E-16 | 2.83229E-14 | UP | #N/A |
| WFDC3 | 21.00301148 | 1.357704581 | 0.49365 |  | 0.00595386 | 0.024495402 | UP | WAP four-disulfide core domain 3(WFDC3) |
| AKR1B1 | 17515.52637 | 1.356628203 | 0.06861 |  | 5.2183E-87 | 6.63616E-83 | UP | aldo-keto reductase family 1 member B(AKR1B1) |
| PAQR5 | 68.0395603 | 1.355607471 | 0.27015 |  | 5.2201E-07 | 9.19446E-06 | UP | progestin and adipoQ receptor family member 5(PAQR5) |
| LINC00313 | 33.48070136 | 1.32952061 | 0.38735 |  | 0.0005983 | 0.003663275 | UP | long intergenic non-protein coding RNA 313(LINC00313) |
| ENSG00000277435 | 18.38584871 | 1.312388295 | 0.51814 |  | 0.01131277 | 0.041127655 | UP | #N/A |
| AREG | 3885.935229 | 1.310968358 | 0.31983 |  | 4.1499E-05 | 0.00039591 | UP | amphiregulin(AREG) |
| MAMDC4 | 160.2137072 | 1.304738744 | 0.19427 |  | 1.8683E-11 | 1.011E-09 | UP | MAM domain containing 4(MAMDC4) |
| AATK | 24.53520643 | 1.298116598 | 0.46136 |  | 0.00489803 | 0.020909104 | UP | apoptosis associated tyrosine kinase(AATK) |
| ENSG00000280191 | 62.51512713 | 1.295940649 | 0.29101 |  | 8.4585E-06 | 0.000101669 | UP | long intergenic non-protein coding RNA 1669(LOC102724354) |
| COL7A1 | 1589.03139 | 1.292376567 | 0.09047 |  | 2.7295E-46 | 2.89259E-43 | UP | collagen type VII alpha 1 chain(COL7A1) |
| TNFRSF9 | 160.7469794 | 1.289730042 | 0.21071 |  | 9.3066E-10 | 3.43674E-08 | UP | TNF receptor superfamily member 9(TNFRSF9) |
| ENSG00000262050 | 18.01453394 | 1.288651592 | 0.50783 |  | 0.01116337 | 0.040642579 | UP | #N/A |
| RNF144B | 81.37883568 | 1.287668834 | 0.25517 |  | 4.5033E-07 | 8.06605E-06 | UP | ring finger protein 144B(RNF144B) |
| PC | 240.0281931 | 1.287022568 | 0.17714 |  | 3.7162E-13 | 2.77996E-11 | UP | pyruvate carboxylase(PC) |
| SLC2A12 | 35.39208808 | 1.276481779 | 0.36956 |  | 0.00055213 | 0.003430142 | UP | solute carrier family 2 member 12(SLC2A12) |
| SMIM14 | 28.71265187 | 1.276413543 | 0.41879 |  | 0.00230451 | 0.011271694 | UP | small integral membrane protein 14(SMIM14) |
| TMEM171 | 34.54129481 | 1.267209507 | 0.38006 |  | 0.00085547 | 0.004981249 | UP | transmembrane protein 171(TMEM171) |
| TBC1D22A-DT | 43.41795402 | 1.259709092 | 0.3514 |  | 0.00033736 | 0.002311507 | UP | TBC1D22A divergent transcript(TBC1D22A-DT) |
| SGPP2 | 57.97035381 | 1.255288602 | 0.32254 |  | 9.9451E-05 | 0.000839225 | UP | sphingosine-1-phosphate phosphatase 2(SGPP2) |
| LINC01443 | 24.91874054 | 1.250441712 | 0.44612 |  | 0.0050644 | 0.021467981 | UP | long intergenic non-protein coding RNA 1443(LINC01443) |
| ENSG00000279561 | 19.82625654 | 1.248345459 | 0.48469 |  | 0.0100079 | 0.037278982 | UP | translation initiation factor IF-2-like(LOC105376060) |
| SOD2 | 10639.05133 | 1.24731498 | 0.07184 |  | 1.5752E-67 | 6.67748E-64 | UP | superoxide dismutase 2(SOD2) |
| ARRB1 | 72.12746756 | 1.244050952 | 0.28366 |  | 1.1562E-05 | 0.00013318 | UP | arrestin beta 1(ARRB1) |
| SLC9A3R2 | 287.6469071 | 1.233274911 | 0.13951 |  | 9.5632E-19 | 1.6002E-16 | UP | #N/A |
| ANPEP | 712.5234949 | 1.223785982 | 0.31853 |  | 0.00012207 | 0.000997699 | UP | alanyl aminopeptidase, membrane(ANPEP) |
| ENSG00000274213 | 20.18554316 | 1.220605622 | 0.47701 |  | 0.01050168 | 0.038710102 | UP | #N/A |
| LINC02262 | 48.68181873 | 1.218514869 | 0.31781 |  | 0.00012601 | 0.001023745 | UP | long intergenic non-protein coding RNA 2262(LINC02262) |
| OLFML2B | 202.9180548 | 1.212041835 | 0.18528 |  | 6.0898E-11 | 2.96722E-09 | UP | olfactomedin like 2B(OLFML2B) |
| ENSG00000289839 | 50.16342455 | 1.21067541 | 0.36616 |  | 0.00094492 | 0.005415296 | UP | #N/A |
| LINC00488 | 23.61292309 | 1.209221472 | 0.48425 |  | 0.01252193 | 0.044556985 | UP | long intergenic non-protein coding RNA 488(LINC00488) |
| RHOV | 35.87108487 | 1.208659398 | 0.41083 |  | 0.00326088 | 0.015003099 | UP | ras homolog family member V(RHOV) |
| CX3CL1 | 397.9596196 | 1.206057947 | 0.12425 |  | 2.8329E-22 | 7.66507E-20 | UP | C-X3-C motif chemokine ligand 1(CX3CL1) |
| SERPINA1 | 547.49556 | 1.205216402 | 0.12851 |  | 6.7107E-21 | 1.47138E-18 | UP | serpin family A member 1(SERPINA1) |
| ST6GALNAC4 | 683.5497101 | 1.200235905 | 0.10438 |  | 1.3353E-30 | 7.07538E-28 | UP | ST6 N-acetylgalactosaminide alpha-2,6-sialyltransferase 4(ST6GALNAC4) |
| PTOV1 | 80.87839154 | 1.190356343 | 0.24657 |  | 1.381E-06 | 2.12108E-05 | UP | PTOV1 extended AT-hook containing adaptor protein(PTOV1) |
| BMF | 54.66259972 | 1.183513353 | 0.30181 |  | 8.8064E-05 | 0.000755165 | UP | Bcl2 modifying factor(BMF) |
| RHEBL1 | 48.11097776 | 1.17295039 | 0.31872 |  | 0.00023304 | 0.001703166 | UP | RHEB like 1(RHEBL1) |
| ENSG00000248367 | 24.55624847 | 1.169803274 | 0.44915 |  | 0.00920084 | 0.034917082 | UP | uncharacterized LOC124901151(LOC124901151) |
| TPD52L1 | 37.02536096 | 1.162282589 | 0.36245 |  | 0.00134267 | 0.007265863 | UP | TPD52 like 1(TPD52L1) |
| RAB43P1 | 41.21318978 | 1.160233022 | 0.34781 |  | 0.00085034 | 0.00495818 | UP | RAB43 pseudogene 1(RAB43P1) |
| EPCAM-DT | 39.04813643 | 1.160213098 | 0.44441 |  | 0.00903607 | 0.034445959 | UP | EPCAM divergent transcript(EPCAM-DT) |
| HES7 | 23.16161629 | 1.157004607 | 0.47192 |  | 0.01421865 | 0.049403985 | UP | hes family bHLH transcription factor 7(HES7) |
| PALM3 | 47.46779657 | 1.145887278 | 0.36243 |  | 0.00156873 | 0.008270951 | UP | paralemmin 3(PALM3) |
| NFKBIA | 1195.868859 | 1.140983535 | 0.10184 |  | 3.8979E-29 | 1.77033E-26 | UP | NFKB inhibitor alpha(NFKBIA) |
| ENSG00000290762 | 43.03785211 | 1.137233063 | 0.37207 |  | 0.00223951 | 0.01101311 | UP | #N/A |
| NFKB2 | 2686.280572 | 1.134197069 | 0.06842 |  | 1.0108E-61 | 2.57092E-58 | UP | nuclear factor kappa B subunit 2(NFKB2) |
| ENSG00000290644 | 55.19462761 | 1.133528543 | 0.30875 |  | 0.00024123 | 0.001755003 | UP | #N/A |
| RHBDL1 | 23.59709628 | 1.127426241 | 0.443 |  | 0.01092899 | 0.039940739 | UP | rhomboid like 1(RHBDL1) |
| NMRAL2P | 26.952878 | 1.122741835 | 0.42062 |  | 0.00760255 | 0.029904632 | UP | NmrA like redox sensor 2, pseudogene(NMRAL2P) |
| VEGFC | 32.4937423 | 1.120809677 | 0.4071 |  | 0.00590262 | 0.024339678 | UP | vascular endothelial growth factor C(VEGFC) |
| C1QL4 | 36.354995 | 1.12045879 | 0.38711 |  | 0.00379867 | 0.017018137 | UP | complement C1q like 4(C1QL4) |
| ENSG00000255050 | 28.66124763 | 1.117491658 | 0.41685 |  | 0.00734447 | 0.029051194 | UP | #N/A |
| CD82 | 178.4495495 | 1.109222868 | 0.23553 |  | 2.4843E-06 | 3.56575E-05 | UP | CD82 molecule(CD82) |
| CLIP4 | 48.60500716 | 1.105718912 | 0.33001 |  | 0.00080656 | 0.004748612 | UP | CAP-Gly domain containing linker protein family member 4(CLIP4) |
| TMEM156 | 26.30152032 | 1.102133461 | 0.42546 |  | 0.00958441 | 0.036039312 | UP | transmembrane protein 156(TMEM156) |
| UNKL | 536.7160737 | 1.101863646 | 0.11785 |  | 8.8131E-21 | 1.89959E-18 | UP | unk like zinc finger(UNKL) |
| ZFYVE28 | 150.6587378 | 1.099336689 | 0.20633 |  | 9.9219E-08 | 2.18678E-06 | UP | zinc finger FYVE-type containing 28(ZFYVE28) |
| ENSG00000253507 | 24.1692893 | 1.099080346 | 0.43576 |  | 0.01166163 | 0.042107041 | UP | #N/A |
| NFE2L3 | 320.5436574 | 1.09901105 | 0.14859 |  | 1.3987E-13 | 1.14759E-11 | UP | NFE2 like bZIP transcription factor 3(NFE2L3) |
| TRIM16L | 1775.629311 | 1.088105329 | 0.07852 |  | 1.1441E-43 | 9.69946E-41 | UP | tripartite motif containing 16 like(TRIM16L) |
| CCDC200 | 27.43022098 | 1.075686636 | 0.40965 |  | 0.00864229 | 0.033223685 | UP | coiled-coil domain containing 200(CCDC200) |
| LIPG | 57.06281364 | 1.075590149 | 0.28398 |  | 0.00015213 | 0.001193288 | UP | lipase G, endothelial type(LIPG) |
| S100A4 | 215.4142698 | 1.074798386 | 0.16967 |  | 2.3785E-10 | 1.01164E-08 | UP | S100 calcium binding protein A4(S100A4) |
| TRANK1 | 130.0570278 | 1.071438154 | 0.20342 |  | 1.385E-07 | 2.9233E-06 | UP | tetratricopeptide repeat and ankyrin repeat containing 1(TRANK1) |
| MEGF6 | 3068.428196 | 1.068206684 | 0.06474 |  | 3.7433E-61 | 6.80056E-58 | UP | multiple EGF like domains 6(MEGF6) |
| NFKBIE | 555.4858127 | 1.065145553 | 0.12561 |  | 2.2551E-17 | 3.25882E-15 | UP | NFKB inhibitor epsilon(NFKBIE) |
| TMEM158 | 186.7110155 | 1.061667088 | 0.19642 |  | 6.4825E-08 | 1.49615E-06 | UP | transmembrane protein 158(TMEM158) |
| SPACA6 | 55.72906649 | 1.060982575 | 0.29573 |  | 0.00033369 | 0.002291319 | UP | sperm acrosome associated 6(SPACA6) |
| IQCD | 54.6735817 | 1.0590693 | 0.30008 |  | 0.00041676 | 0.002731955 | UP | IQ motif containing D(IQCD) |
| ZC3H12A | 504.4137214 | 1.058928366 | 0.11519 |  | 3.8225E-20 | 7.96899E-18 | UP | zinc finger CCCH-type containing 12A(ZC3H12A) |
| HSF4 | 56.45796623 | 1.058853794 | 0.32315 |  | 0.00105045 | 0.005924004 | UP | heat shock transcription factor 4(HSF4) |
| AKR1C2 | 649.6438404 | 1.058573734 | 0.1053 |  | 8.9069E-24 | 2.63416E-21 | UP | aldo-keto reductase family 1 member C2(AKR1C2) |
| GGT4P | 948.2916375 | 1.0578441 | 0.11213 |  | 3.9495E-21 | 9.13198E-19 | UP | gamma-glutamyltransferase 4 pseudogene(GGT4P) |
| ENSG00000259354 | 37.81678704 | 1.057276601 | 0.38407 |  | 0.00590845 | 0.024355831 | UP | #N/A |
| ADAMTS7 | 366.8771864 | 1.047212012 | 0.12953 |  | 6.2416E-16 | 7.15087E-14 | UP | ADAM metallopeptidase with thrombospondin type 1 motif 7(ADAMTS7) |
| ENSG00000236938 | 39.34367145 | 1.04604922 | 0.36438 |  | 0.00409468 | 0.018105699 | UP | #N/A |
| GRAMD2A | 32.17367262 | 1.045240244 | 0.37401 |  | 0.00519536 | 0.021928126 | UP | GRAM domain containing 2A(GRAMD2A) |
| TPCN1 | 4273.786373 | 1.044200672 | 0.06031 |  | 3.6169E-67 | 1.14991E-63 | UP | two pore segment channel 1(TPCN1) |
| PAX8 | 114.0774797 | 1.04008372 | 0.20295 |  | 2.9801E-07 | 5.63949E-06 | UP | paired box 8(PAX8) |
| BRICD5 | 28.12074621 | 1.039299423 | 0.40392 |  | 0.01008029 | 0.037515111 | UP | BRICHOS domain containing 5(BRICD5) |
| SLCO4A1 | 3566.061844 | 1.031726853 | 0.06606 |  | 5.4211E-55 | 6.89398E-52 | UP | solute carrier organic anion transporter family member 4A1(SLCO4A1) |
| KCNK3 | 1180.556968 | 1.026865059 | 0.11389 |  | 1.9414E-19 | 3.68494E-17 | UP | potassium two pore domain channel subfamily K member 3(KCNK3) |
| ZNF837 | 43.9438911 | 1.026531985 | 0.32915 |  | 0.00181631 | 0.009309964 | UP | zinc finger protein 837(ZNF837) |
| PGGHG | 469.639066 | 1.026377088 | 0.10877 |  | 3.863E-21 | 9.09732E-19 | UP | protein-glucosylgalactosylhydroxylysine glucosidase(PGGHG) |
| COL6A1 | 1696.831616 | 1.024081986 | 0.08387 |  | 2.7133E-34 | 1.72527E-31 | UP | collagen type VI alpha 1 chain(COL6A1) |
| BFSP1 | 103.4601228 | 1.016356666 | 0.23302 |  | 1.2902E-05 | 0.000145976 | UP | beaded filament structural protein 1(BFSP1) |
| ZNF467 | 304.5514326 | 1.013726249 | 0.35042 |  | 0.00381712 | 0.017080335 | UP | zinc finger protein 467(ZNF467) |
| LACTB | 59.9325034 | 1.007908666 | 0.30123 |  | 0.00081999 | 0.004812089 | UP | lactamase beta(LACTB) |
| AKR1C1 | 2781.012441 | 1.007484428 | 0.07626 |  | 7.5294E-40 | 5.98445E-37 | UP | aldo-keto reductase family 1 member C1(AKR1C1) |
| ATG16L2 | 131.5606598 | 1.001999864 | 0.20338 |  | 8.364E-07 | 1.37778E-05 | UP | autophagy related 16 like 2(ATG16L2) |
| CELF2 | 68.96008457 | -1.012165448 | 0.26166 |  | 0.00010963 | 0.00091243 | DOWN | CUGBP Elav-like family member 2(CELF2) |
| KCNH1 | 40.57583995 | -1.01380309 | 0.35816 |  | 0.00464638 | 0.020077479 | DOWN | potassium voltage-gated channel subfamily H member 1(KCNH1) |
| CDH6 | 631.9834499 | -1.044599459 | 0.14216 |  | 2.0085E-13 | 1.57671E-11 | DOWN | cadherin 6(CDH6) |
| SMIM24 | 80.05265014 | -1.044849866 | 0.26378 |  | 7.4607E-05 | 0.000652979 | DOWN | small integral membrane protein 24(SMIM24) |
| DOCK2 | 660.634138 | -1.058742034 | 0.1035 |  | 1.4606E-24 | 4.76266E-22 | DOWN | dedicator of cytokinesis 2(DOCK2) |
| PAX8-AS1 | 176.2260243 | -1.058885169 | 0.17219 |  | 7.7741E-10 | 2.95114E-08 | DOWN | PAX8 antisense RNA 1(PAX8-AS1) |
| ENSG00000242553 | 51.77259918 | -1.063421863 | 0.31092 |  | 0.0006256 | 0.003808379 | DOWN | #N/A |
| ANKRD1 | 466.1436283 | -1.080370398 | 0.16656 |  | 8.7844E-11 | 4.09198E-09 | DOWN | ankyrin repeat domain 1(ANKRD1) |
| TAF1A-AS1 | 27.34881464 | -1.086638886 | 0.42359 |  | 0.01030917 | 0.038122062 | DOWN | TAF1A antisense RNA 1(TAF1A-AS1) |
| CCDC80 | 25.54908672 | -1.0890936 | 0.42049 |  | 0.00959569 | 0.036060384 | DOWN | coiled-coil domain containing 80(CCDC80) |
| RHOU | 28.53912737 | -1.10777548 | 0.45112 |  | 0.0140649 | 0.048963406 | DOWN | ras homolog family member U(RHOU) |
| SLC16A9 | 34.68302167 | -1.1715508 | 0.38125 |  | 0.00211951 | 0.010549451 | DOWN | solute carrier family 16 member 9(SLC16A9) |
| ENC1 | 987.336713 | -1.17558341 | 0.26977 |  | 1.3138E-05 | 0.000148121 | DOWN | ectodermal-neural cortex 1(ENC1) |
| GREB1 | 23.66531699 | -1.200291699 | 0.46904 |  | 0.01049563 | 0.038699026 | DOWN | growth regulating estrogen receptor binding 1(GREB1) |
| NEFL | 1302.998274 | -1.200493071 | 0.41879 |  | 0.00414945 | 0.01827801 | DOWN | neurofilament light chain(NEFL) |
| HRK | 27.53909215 | -1.29957579 | 0.43666 |  | 0.0029187 | 0.013691315 | DOWN | harakiri, BCL2 interacting protein(HRK) |
| PKHD1 | 63.9089557 | -1.311859039 | 0.28324 |  | 3.6288E-06 | 4.96206E-05 | DOWN | PKHD1 ciliary IPT domain containing fibrocystin/polyductin(PKHD1) |
| HORMAD2-AS1 | 16.38130256 | -1.375725708 | 0.5453 |  | 0.0116396 | 0.042051375 | DOWN | HORMAD2 and MTMR3 antisense RNA 1(HORMAD2-AS1) |
| ENSG00000286856 | 71.76167158 | -1.38967043 | 0.27463 |  | 4.1884E-07 | 7.54447E-06 | DOWN | #N/A |
| UNC79 | 16.10605975 | -1.401693747 | 0.56802 |  | 0.01359967 | 0.047539019 | DOWN | unc-79 homolog, NALCN channel complex subunit(UNC79) |
| ENSG00000248199 | 37.08015659 | -1.404986826 | 0.4001 |  | 0.0004455 | 0.00287586 | DOWN | #N/A |
| FGB | 1322.570851 | -1.441683784 | 0.08832 |  | 6.7895E-60 | 1.07928E-56 | DOWN | fibrinogen beta chain(FGB) |
| SLCO4C1 | 57.80931232 | -1.500449851 | 0.31815 |  | 2.4032E-06 | 3.46892E-05 | DOWN | solute carrier organic anion transporter family member 4C1(SLCO4C1) |
| NPNT | 90.44313417 | -1.529088042 | 0.23791 |  | 1.299E-10 | 5.81654E-09 | DOWN | nephronectin(NPNT) |
| ARHGAP28 | 56.51796503 | -1.53301957 | 0.30112 |  | 3.5619E-07 | 6.57424E-06 | DOWN | Rho GTPase activating protein 28(ARHGAP28) |
| C1orf116 | 12.83673795 | -1.56932167 | 0.63039 |  | 0.01279389 | 0.045320324 | DOWN | chromosome 1 open reading frame 116(C1orf116) |
| ENSG00000276851 | 37.66641036 | -1.623060278 | 0.40115 |  | 5.2107E-05 | 0.000480181 | DOWN | #N/A |
| APBA1 | 77.73145949 | -1.734613144 | 0.27467 |  | 2.697E-10 | 1.13192E-08 | DOWN | amyloid beta precursor protein binding family A member 1(APBA1) |
| ENSG00000288085 | 20.91837028 | -1.778851101 | 0.52033 |  | 0.00062929 | 0.003823531 | DOWN | #N/A |
| SLAMF7 | 13.36894147 | -1.840054142 | 0.67062 |  | 0.00607324 | 0.024930087 | DOWN | SLAM family member 7(SLAMF7) |
| NKAIN4 | 10.63048692 | -1.847616417 | 0.73287 |  | 0.01169974 | 0.042196702 | DOWN | sodium/potassium transporting ATPase interacting 4(NKAIN4) |
| LINC00571 | 10.80096799 | -1.855056546 | 0.75572 |  | 0.01410018 | 0.049059366 | DOWN | long intergenic non-protein coding RNA 571(LINC00571) |
| UNC13C | 8.868999783 | -1.944259269 | 0.75296 |  | 0.00981861 | 0.03671916 | DOWN | unc-13 homolog C(UNC13C) |
| EPHA7 | 829.8016104 | -2.087931878 | 0.10708 |  | 1.1403E-84 | 7.25051E-81 | DOWN | EPH receptor A7(EPHA7) |
| SLC26A5-AS1 | 9.85255604 | -2.285084696 | 0.74163 |  | 0.00206193 | 0.010311261 | DOWN | SLC26A5 antisense RNA 1(SLC26A5-AS1) |
| SULT1B1 | 23.11920729 | -2.333807748 | 0.49817 |  | 2.8029E-06 | 3.9407E-05 | DOWN | sulfotransferase family 1B member 1(SULT1B1) |
| FLT3 | 14.35560724 | -2.335935596 | 0.62732 |  | 0.00019634 | 0.001480949 | DOWN | fms related receptor tyrosine kinase 3(FLT3) |
